# Supplementary material
Source: PubMed Central journal article supplement (PMC8316309)
Supplement: NIHMS1707606-supplement-Supplemental_Material.pdf [file NIHMS1707606-supplement-Supplemental_Material.pdf]

## SUPPLEMENTAL MATERIAL

### Contents

|                                                                                                                                                                   |        |
|-------------------------------------------------------------------------------------------------------------------------------------------------------------------|--------|
| <b>Supplemental Results.</b> Sensitivity and secondary analyses.                                                                                                  | Page 2 |
| <b>Table I.</b> <i>International Classification of Diseases (ICD)</i> codes used in the analyses.                                                                 | Page 3 |
| <b>Table II.</b> Associations between gestational age at birth (1973-1994) and risk of stroke (1991-2015), stratified by sex, Sweden.                             | Page 4 |
| <b>Table III.</b> Interactions between preterm birth and sex (1973-1994) in relation to stroke risk (1991-2015), Sweden.                                          | Page 5 |
| <b>Table IV.</b> Interactions between preterm birth and fetal growth (1973-1994) in relation to stroke risk at ages 18-43 years (1991-2015), Sweden.              | Page 6 |
| <b>Table V.</b> Associations between gestational age at birth (1973-1994) and risk of stroke (1991-2015) at ages 18-26 years, stratified by birth decade, Sweden. | Page 7 |
| <b>Table VI.</b> Interactions between preterm birth and birth year (1973-1994) in relation to stroke risk at ages 18-26 years (1991-2015), Sweden.                | Page 8 |
| <b>Table VII.</b> Spontaneous or medically indicated birth (1990-1994) and subsequent risk of stroke (2008-2015), Sweden.                                         | Page 9 |

## Supplemental Results.

### Sensitivity Analyses

In sensitivity analyses that examined alternatives to multiple imputation for missing data, all results were similar to the main findings and the conclusions were unchanged. For example, the adjusted HR for stroke at ages 18-43 years comparing preterm vs. full-term was 1.40 (95% CI, 1.06-1.84;  $P=0.02$ ) when restricting to women with complete data, and 1.26 (1.11-1.42;  $P<0.001$ ) when coding missing data as a separate category. In the complete case analysis, adjustment for maternal smoking and BMI had only a modest effect on risk estimates (i.e., were not major confounders).

### Secondary Analyses

In a secondary co-sibling analysis that compared only the first preterm-born individual in each family (90.0% of all persons born preterm) with their full-term siblings, all risk estimates were little changed. For example, comparing preterm vs. full-term, the adjusted HR for any stroke was 1.20 (95% CI, 0.94-1.54), for hemorrhagic stroke was 1.08 (0.78-1.50), and for ischemic stroke was 1.22 (0.81-1.84).

The main risk estimates were negligibly affected by additional adjustment for fetal growth. When adjusted for each other and all other covariates, both preterm birth and SGA were associated with significantly increased risk of stroke (1.27; 95% CI, 1.12-1.43;  $P<0.001$  and 1.14; 1.04-1.24;  $P=0.003$ , respectively;  $P=0.16$  for difference in HRs). Preterm birth was associated with significantly increased stroke risks among persons born SGA and those who were not (Table IV). No interaction was found between preterm birth and SGA on the additive ( $P=0.14$ ) nor multiplicative ( $P=0.17$ ) scale.

The percentage of all preterm-born individuals who survived to age 18 years was 91.4% for those born in the 1970s, 94.7% for those born in the 1980s, and 95.4% for those born in the 1990s. Potential interactions between preterm birth and birth year in relation to stroke risk were explored after follow-up to ages 18-26 years (thus allowing consistent follow-up ages across different birth years). A trend of stronger associations by later birth years was observed (Table V). For example, the adjusted HR for stroke associated with preterm birth was 1.03 (95% CI, 0.66-1.60;  $P=0.90$ ) for persons born in 1973-1979, 1.17 (0.89-1.55;  $P=0.26$ ) for those born in 1980-1989, and 1.64 (1.08-2.50;  $P=0.02$ ) for those born in 1990-1994. However, no significant interaction between preterm birth and birth year was found on the additive ( $P=0.26$ ) nor multiplicative ( $P=0.42$ ) scale (Table VI).

In exploratory analyses, both spontaneous and medically indicated preterm birth appeared to be associated with increased stroke risk (adjusted HR, 1.76; 95% CI, 0.98-3.15; and 1.97; 1.06-3.69, respectively; Table VII). However, this information was available for only a smaller subcohort born in 1990 or later who had sufficient follow-up into early adulthood, thus reducing precision.

**Table I. International Classification of Diseases (ICD) codes used in the analyses.**

| <b>Diagnosis</b>                    | <b>ICD-8</b>        | <b>ICD-9</b>                   | <b>ICD-10</b>                     |
|-------------------------------------|---------------------|--------------------------------|-----------------------------------|
| <b>Stroke</b>                       |                     |                                |                                   |
| Any stroke                          | 430-431,<br>433-434 | 430-432, 433.X1, 434           | I60-I64                           |
| Hemorrhagic stroke                  | 430-431             | 430-432                        | I60-I62                           |
| Ischemic stroke                     | 433-434             | 433.X1, 434                    | I63                               |
| Stroke, unspecified                 | --                  | --                             | I64                               |
| <b>Preeclampsia</b>                 | 637                 | 624.4-624.7                    | O14-O15                           |
| <b>Other hypertensive disorders</b> | 400-404             | 401-405, 642.0-642.3,<br>642.9 | I10-I15, O10-O11, O13,<br>O15-O16 |
| <b>Diabetes mellitus</b>            | 250                 | 250, 648.0, 648.8              | E10-E14, O24                      |

**Table II. Associations between gestational age at birth (1973-1994) and risk of stroke (1991-2015), stratified by sex,\* Sweden.**

|                             | Cases | Rate <sup>  </sup> | Unadjusted        | Adjusted <sup>†</sup> |       | AF <sub>e</sub> <sup>‡</sup><br>(%) | PAR <sup>§</sup><br>(%) |
|-----------------------------|-------|--------------------|-------------------|-----------------------|-------|-------------------------------------|-------------------------|
|                             |       |                    | HR (95% CI)       | HR (95% CI)           | P     |                                     |                         |
| <b>Men</b>                  |       |                    |                   |                       |       |                                     |                         |
| Preterm (<37 wks)           | 152   | 21.2               | 1.31 (1.11, 1.55) | 1.25 (1.06, 1.48)     | 0.009 | 22.5                                | 1.9                     |
| Early preterm (<34 wks)     | 32    | 21.5               | 1.35 (0.95, 1.91) | 1.26 (0.89, 1.79)     | 0.20  | 23.8                                | 0.5                     |
| Late preterm (34-36 wks)    | 120   | 21.1               | 1.30 (1.08, 1.57) | 1.25 (1.04, 1.50)     | 0.02  | 22.1                                | 1.5                     |
| Early term (37-38 wks)      | 413   | 17.2               | 1.08 (0.97, 1.20) | 1.05 (0.94, 1.17)     | 0.39  | 4.7                                 | 1.0                     |
| Full-term (39-41 wks)       | 1,618 | 16.4               | Reference         | Reference             |       |                                     |                         |
| Post-term (≥42 wks)         | 266   | 17.7               | 1.01 (0.89, 1.15) | 1.03 (0.90, 1.17)     | 0.66  | 6.9                                 | 1.0                     |
| Per additional week (trend) |       |                    | 0.97 (0.95, 0.99) | 0.98 (0.96, 0.99)     | 0.02  |                                     |                         |
| <b>Women</b>                |       |                    |                   |                       |       |                                     |                         |
| Preterm (<37 wks)           | 131   | 22.7               | 1.31 (1.10, 1.56) | 1.28 (1.07, 1.53)     | 0.007 | 21.7                                | 1.6                     |
| Early preterm (<34 wks)     | 34    | 28.5               | 1.66 (1.18, 2.34) | 1.61 (1.15, 2.27)     | 0.006 | 37.6                                | 0.7                     |
| Late preterm (34-36 wks)    | 97    | 21.2               | 1.22 (0.99, 1.50) | 1.19 (0.97, 1.46)     | 0.09  | 16.1                                | 0.9                     |
| Early term (37-38 wks)      | 354   | 16.9               | 0.99 (0.89, 1.11) | 0.98 (0.87, 1.10)     | 0.70  | (5.0) <sup>#</sup>                  | (0.9) <sup>**</sup>     |
| Full-term (39-41 wks)       | 1,685 | 17.8               | Reference         | Reference             |       |                                     |                         |
| Post-term (≥42 wks)         | 242   | 17.0               | 0.88 (0.77, 1.01) | 0.89 (0.78, 1.02)     | 0.10  | (4.8) <sup>#</sup>                  | (0.6) <sup>**</sup>     |
| Per additional week (trend) |       |                    | 0.97 (0.95, 0.99) | 0.97 (0.95, 0.99)     | 0.008 |                                     |                         |

<sup>\*</sup>Wald tests for interaction between preterm birth and sex: additive scale,  $P=0.93$ ; multiplicative scale,  $P=0.96$ .

<sup>†</sup>Adjusted for child characteristics (age, birth year, birth order), maternal characteristics (age, education, birth country or region, BMI, smoking, preeclampsia, other hypertensive disorders, diabetes), and paternal characteristics (age, education).

<sup>‡</sup>Attributable fraction among the exposed.

<sup>§</sup>Population attributable fraction.

<sup>||</sup>Stroke incidence rate per 100,000 person-years.

<sup>#</sup>Prevented fraction among the exposed.

<sup>\*\*</sup>Population prevented fraction.

**Table III. Interactions between preterm birth and sex (1973-1994) in relation to stroke risk (1991-2015), Sweden.**

|                                                              | Gestational age at birth |                                      |                         |                                       | HRs (95% CI) for preterm vs. full-term within sex strata |
|--------------------------------------------------------------|--------------------------|--------------------------------------|-------------------------|---------------------------------------|----------------------------------------------------------|
|                                                              | Full-term (39-41 wks)    |                                      | Preterm (<37 wks)       |                                       |                                                          |
|                                                              | No. (rate) <sup>*</sup>  | HR (95% CI) <sup>†</sup>             | No. (rate) <sup>*</sup> | HR (95% CI) <sup>†</sup>              |                                                          |
| <b>Sex</b>                                                   |                          |                                      |                         |                                       |                                                          |
| Men                                                          | 1,618<br>(16.4)          | Reference                            | 152<br>(21.2)           | 1.27 (1.07, 1.50);<br><i>P</i> =0.005 | 1.27 (1.07, 1.50);<br><i>P</i> =0.005                    |
| Women                                                        | 1,685<br>(17.8)          | 1.09 (1.01, 1.16);<br><i>P</i> =0.02 | 131<br>(22.7)           | 1.37 (1.14, 1.63);<br><i>P</i> =0.001 | 1.26 (1.03, 1.48);<br><i>P</i> =0.02                     |
| HRs (95% CI) for women vs. men within gestational age strata |                          | 1.09 (1.01, 1.16);<br><i>P</i> =0.02 |                         | 1.08 (0.83, 1.33);<br><i>P</i> =0.54  |                                                          |
| Interaction on additive scale: RERI (95% CI)                 |                          |                                      | 0.01 (-0.30, 0.33);     | <i>P</i> =0.93                        |                                                          |
| Interaction on multiplicative scale: HR ratio (95% CI)       |                          |                                      | 0.99 (0.75, 1.23);      | <i>P</i> =0.96                        |                                                          |

<sup>\*</sup>Number of strokes and incidence rate per 100,000 person-years.

<sup>†</sup>Adjusted for child characteristics (age, birth year, birth order), maternal characteristics (age, education, birth country or region, BMI, smoking, preeclampsia, other hypertensive disorders, diabetes), and paternal characteristics (age, education).

HR = hazard ratio, RERI = relative excess risk due to interaction

**Table IV. Interactions between preterm birth and fetal growth (1973-1994) in relation to stroke risk at ages 18-43 years (1991-2015), Sweden.**

|                                                            | Gestational age at birth |                                      |                     |                                       | HRs (95% CI) for preterm vs. full-term within fetal growth strata |
|------------------------------------------------------------|--------------------------|--------------------------------------|---------------------|---------------------------------------|-------------------------------------------------------------------|
|                                                            | Full-term (39-41 wks)    |                                      | Preterm (<37 wks)   |                                       |                                                                   |
|                                                            | No. (rate)*              | HR (95% CI)†                         | No. (rate)*         | HR (95% CI)†                          |                                                                   |
| <b>Fetal growth</b>                                        |                          |                                      |                     |                                       |                                                                   |
| Appropriate for gestational age (AGA)                      | 2,613<br>(19.0)          | Reference                            | 205<br>(23.2)       | 1.21 (1.05, 1.39);<br><i>P</i> =0.009 | 1.21 (1.05, 1.39);<br><i>P</i> =0.009                             |
| Small for gestational age (SGA)                            | 690<br>(12.4)            | 1.01 (0.88, 1.16);<br><i>P</i> =0.90 | 78<br>(19.1)        | 1.50 (1.17, 1.93);<br><i>P</i> =0.001 | 1.49 (1.14, 1.84);<br><i>P</i> =0.006                             |
| HRs (95% CI) for SGA vs. AGA within gestational age strata |                          | 1.01 (0.88, 1.16);<br><i>P</i> =0.90 |                     | 1.24 (0.89, 1.60);<br><i>P</i> =0.17  |                                                                   |
| Interaction on additive scale: RERI (95% CI)               |                          |                                      | 0.29 (-0.10, 0.67); | <i>P</i> =0.14                        |                                                                   |
| Interaction on multiplicative scale: HR ratio (95% CI)     |                          |                                      | 1.23 (0.90, 1.57);  | <i>P</i> =0.17                        |                                                                   |

\*Number of strokes and incidence rate per 100,000 person-years.

†Adjusted for child characteristics (age, sex, birth year, birth order), maternal characteristics (age, education, birth country or region, BMI, smoking, preeclampsia, other hypertensive disorders, diabetes), and paternal characteristics (age, education).

HR = hazard ratio, RERI = relative excess risk due to interaction

**Table V. Associations between gestational age at birth (1973-1994) and risk of stroke (1991-2015) at ages 18-26 years, stratified by birth decade, Sweden.**

|                             | Cases | Rate <sup>‡</sup> | Unadjusted        | Adjusted <sup>*</sup> | P    |
|-----------------------------|-------|-------------------|-------------------|-----------------------|------|
|                             |       |                   | HR (95% CI)       | HR (95% CI)           |      |
| <b>Born in 1973-1979</b>    |       |                   |                   |                       |      |
| Preterm (<37 wks)           | 21    | 9.7               | 1.08 (0.69, 1.68) | 1.03 (0.66, 1.60)     | 0.90 |
| Early preterm (<34 wks)     | 5     | 11.6              | 1.29 (0.54, 3.13) | 1.21 (0.50, 2.93)     | 0.67 |
| Late preterm (34-36 wks)    | 16    | 9.2               | 1.03 (0.62, 1.70) | 0.98 (0.59, 1.62)     | 0.94 |
| Early term (37-38 wks)      | 55    | 7.7               | 0.86 (0.66, 1.14) | 0.84 (0.63, 1.11)     | 0.22 |
| Full-term (39-41 wks)       | 321   | 9.0               | Reference         | Reference             |      |
| Post-term (≥42 wks)         | 58    | 8.6               | 0.95 (0.72, 1.26) | 0.96 (0.72, 1.27)     | 0.77 |
| Per additional week (trend) |       |                   | 1.00 (0.95, 1.05) | 1.00 (0.95, 1.06)     | 0.83 |
| <b>Born in 1980-1989</b>    |       |                   |                   |                       |      |
| Preterm (<37 wks)           | 55    | 14.8              | 1.23 (0.93, 1.62) | 1.17 (0.89, 1.55)     | 0.26 |
| Early preterm (<34 wks)     | 16    | 20.5              | 1.70 (1.04, 2.80) | 1.59 (0.97, 2.62)     | 0.07 |
| Late preterm (34-36 wks)    | 39    | 13.2              | 1.10 (0.80, 1.52) | 1.06 (0.76, 1.47)     | 0.73 |
| Early term (37-38 wks)      | 165   | 12.3              | 1.02 (0.86, 1.21) | 0.99 (0.83, 1.17)     | 0.87 |
| Full-term (39-41 wks)       | 601   | 12.0              | Reference         | Reference             |      |
| Post-term (≥42 wks)         | 59    | 10.3              | 0.85 (0.65, 1.12) | 0.88 (0.67, 1.15)     | 0.35 |
| Per additional week (trend) |       |                   | 0.96 (0.93, 1.00) | 0.97 (0.94, 1.01)     | 0.18 |
| <b>Born in 1990-1994</b>    |       |                   |                   |                       |      |
| Preterm (<37 wks)           | 25    | 17.1              | 1.67 (1.11, 2.53) | 1.64 (1.08, 2.50)     | 0.02 |
| Early preterm (<34 wks)     | 6     | 17.9              | 1.75 (0.78, 3.94) | 1.71 (0.75, 3.87)     | 0.20 |
| Late preterm (34-36 wks)    | 19    | 16.9              | 1.65 (1.03, 2.64) | 1.62 (1.01, 2.60)     | 0.05 |
| Early term (37-38 wks)      | 74    | 13.6              | 1.33 (1.02, 1.74) | 1.32 (1.02, 1.73)     | 0.04 |
| Full-term (39-41 wks)       | 216   | 10.2              | Reference         | Reference             |      |
| Post-term (≥42 wks)         | 31    | 14.3              | 1.40 (0.96, 2.04) | 1.37 (0.94, 2.00)     | 0.10 |
| Per additional week (trend) |       |                   | 0.95 (0.90, 1.00) | 0.95 (0.90, 1.00)     | 0.05 |

<sup>\*</sup>Adjusted for child characteristics (age, sex, birth year, birth order), maternal characteristics (age, education, birth country or region, BMI, smoking, preeclampsia, other hypertensive disorders, diabetes), and paternal characteristics (age, education).

<sup>‡</sup>Stroke incidence rate per 100,000 person-years.

**Table VI. Interactions between preterm birth and birth year (1973-1994) in relation to stroke risk at ages 18-26 years (1991-2015), Sweden.**

|                                                              | Gestational age at birth |                                       |                                    |                                       | HRs (95% CI) for preterm vs. full-term within birth year strata |
|--------------------------------------------------------------|--------------------------|---------------------------------------|------------------------------------|---------------------------------------|-----------------------------------------------------------------|
|                                                              | Full-term (39-41 wks)    |                                       | Preterm (<37 wks)                  |                                       |                                                                 |
| Birth year                                                   | No. (rate)*              | HR (95% CI)†                          | No. (rate)*                        | HR (95% CI)†                          |                                                                 |
| <1985                                                        | 568<br>(9.6)             | Reference                             | 43<br>(11.1)                       | 1.12 (0.82, 1.52);<br><i>P</i> =0.48  | 1.12 (0.82, 1.52);<br><i>P</i> =0.48                            |
| ≥1985                                                        | 570<br>(11.9)            | 1.31 (1.15, 1.48);<br><i>P</i> <0.001 | 58<br>(16.7)                       | 1.76 (1.33, 2.31);<br><i>P</i> <0.001 | 1.34 (0.98, 1.71);<br><i>P</i> =0.06                            |
| HRs (95% CI) for women vs. men within gestational age strata |                          | 1.31 (1.15, 1.48);<br><i>P</i> <0.001 |                                    | 1.57 (0.95, 2.20);<br><i>P</i> =0.07  |                                                                 |
| Interaction on additive scale: RERI (95% CI)                 |                          |                                       | 0.33 (-0.24, 0.91); <i>P</i> =0.26 |                                       |                                                                 |
| Interaction on multiplicative scale: HR ratio (95% CI)       |                          |                                       | 1.20 (0.71, 1.70); <i>P</i> =0.42  |                                       |                                                                 |

\*Number of strokes and incidence rate per 100,000 person-years.

†Adjusted for child characteristics (age, sex, birth order), maternal characteristics (age, education, birth country or region, BMI, smoking, preeclampsia, other hypertensive disorders, diabetes), and paternal characteristics (age, education).

HR = hazard ratio, RERI = relative excess risk due to interaction



**Table VII. Spontaneous or medically indicated birth (1990-1994) and subsequent risk of stroke (2008-2015), Sweden.**

|                     | Cases | Rate <sup>a</sup> | HR (95% CI) <sup>†</sup> | <i>P</i> | <i>P</i> for difference in HRs |
|---------------------|-------|-------------------|--------------------------|----------|--------------------------------|
| <b>Preterm</b>      |       |                   |                          |          | 0.78                           |
| Spontaneous         | 12    | 17.6              | 1.76 (0.98, 3.15)        | 0.06     |                                |
| Medically indicated | 11    | 19.8              | 1.97 (1.06, 3.69)        | 0.03     |                                |
| <b>Early term</b>   |       |                   |                          |          | 0.26                           |
| Spontaneous         | 37    | 12.0              | 1.22 (0.86, 1.74)        | 0.26     |                                |
| Medically indicated | 24    | 16.6              | 1.65 (1.08, 2.53)        | 0.02     |                                |
| <b>Full-term</b>    | 216   | 10.2              | Reference                |          |                                |

<sup>a</sup>Stroke incidence rate per 100,000 person-years.

<sup>†</sup>Adjusted for child characteristics (age, sex, birth year, birth order), maternal characteristics (age, education, birth country or region, BMI, smoking, preeclampsia, other hypertensive disorders, diabetes), and paternal characteristics (age, education).
